# Supplementary material for: A guide to computational methods for G-quadruplex prediction
Source: Oxford University Press journal article supplement (doi:10.1093/nar/gkz1097), 2019-11-04
Supplement: gkz1097_supplemental_file.pdf [file gkz1097_supplemental_file.pdf]

Mouse (mm10)

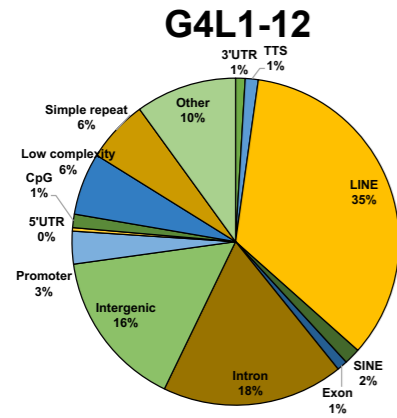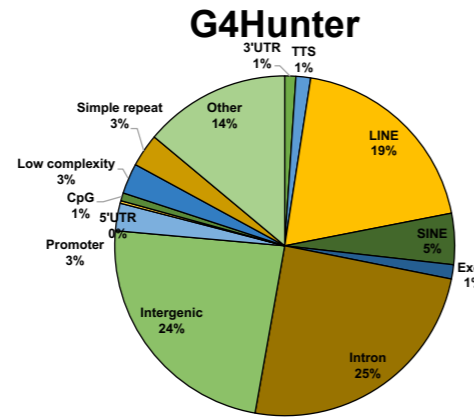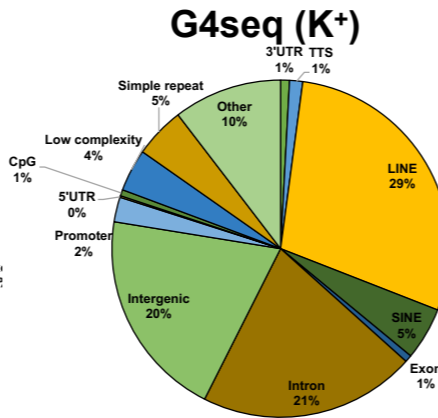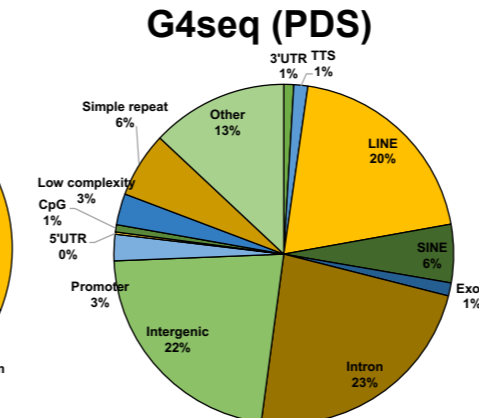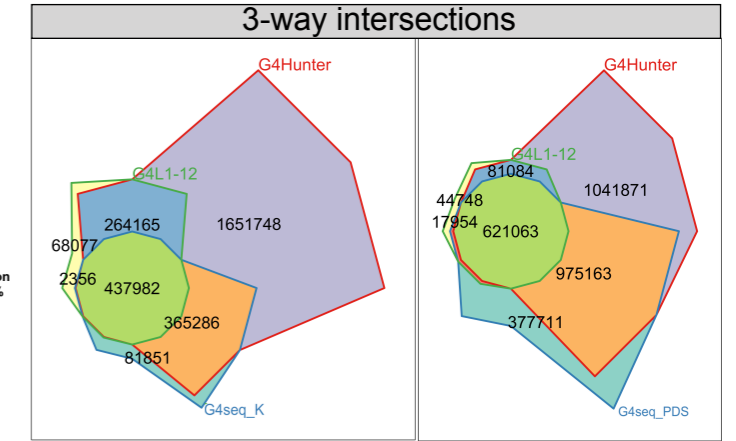

Worm (ce11)

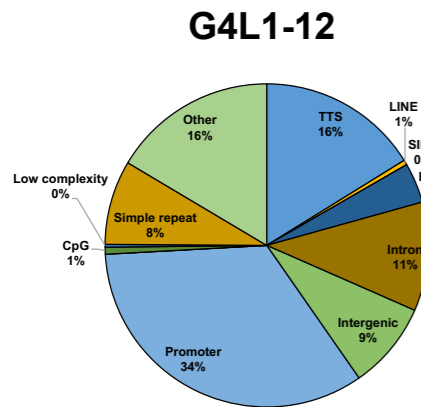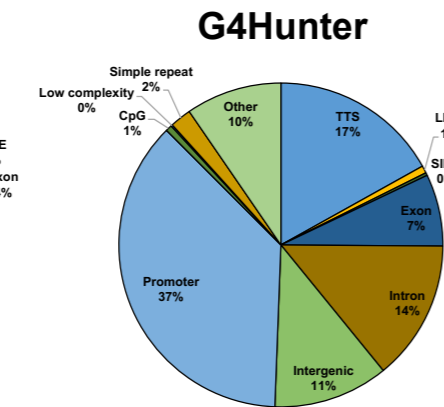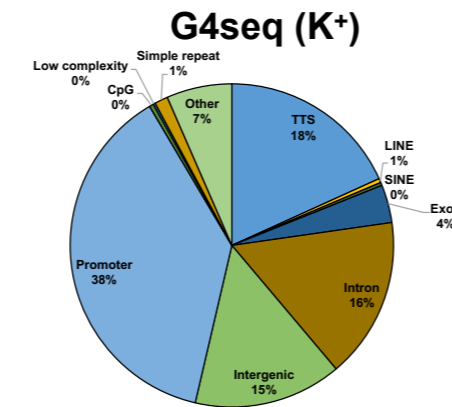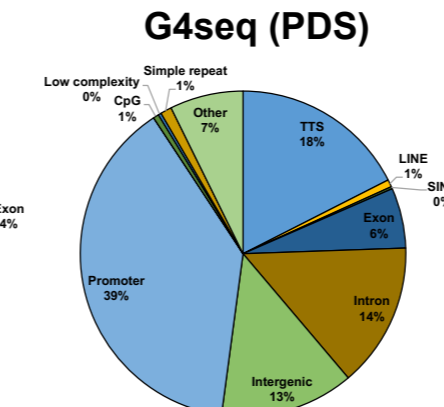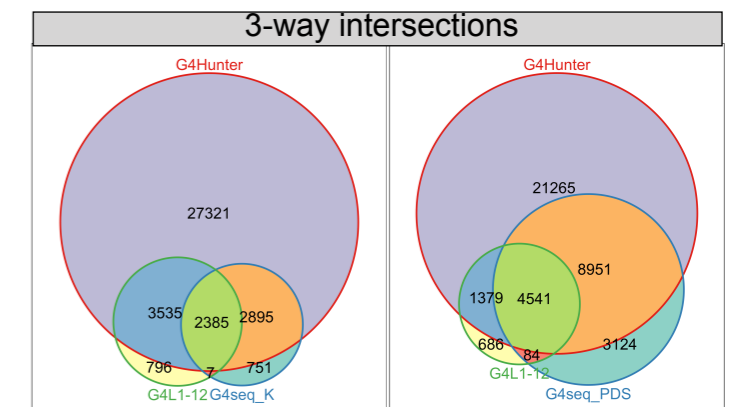

Yeast (sacCer3)

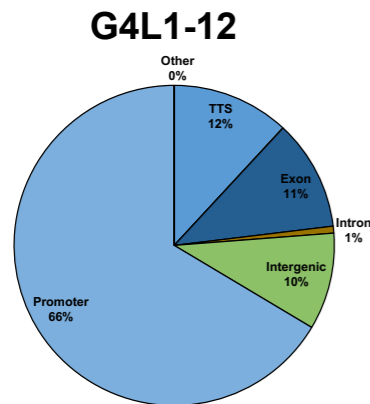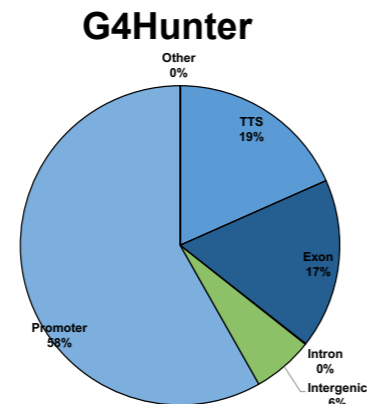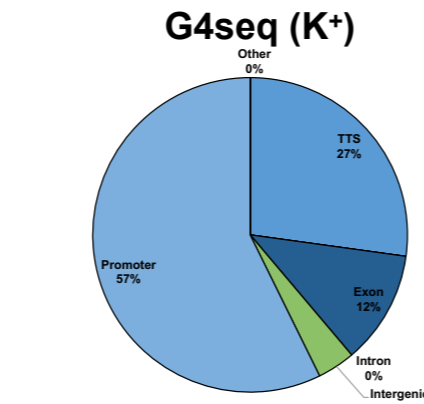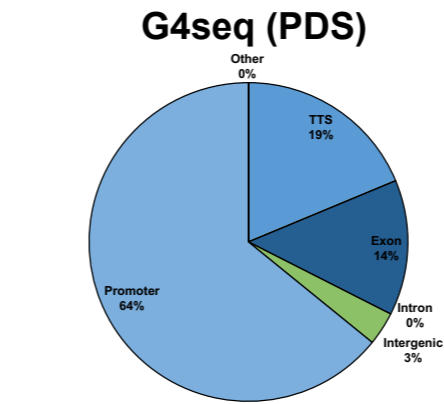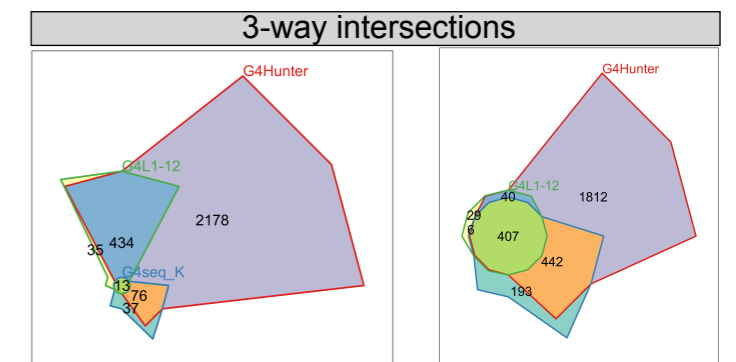

**Figure S1. Genomic distribution of G-quadruplex sequences found using different prediction methods.** G4 sequences predicted by three different approaches (G4L1-12: regular expression matching  $G_{3-5}N_{1-12}G_{3-5}N_{1-12}G_{3-5}N_{1-12}G_{3-5}$ , G4Hunter: sliding window and scoring, and G4-seq: high-throughput *in vitro* detection) were annotated. Genomic features were obtained from the respective annotation files in the 3 species shown. The 3-way overlaps between the different datasets are represented as weighted Venn diagrams (with area-proportional circles or faces for clarity).

### *C.elegans* (ce11)

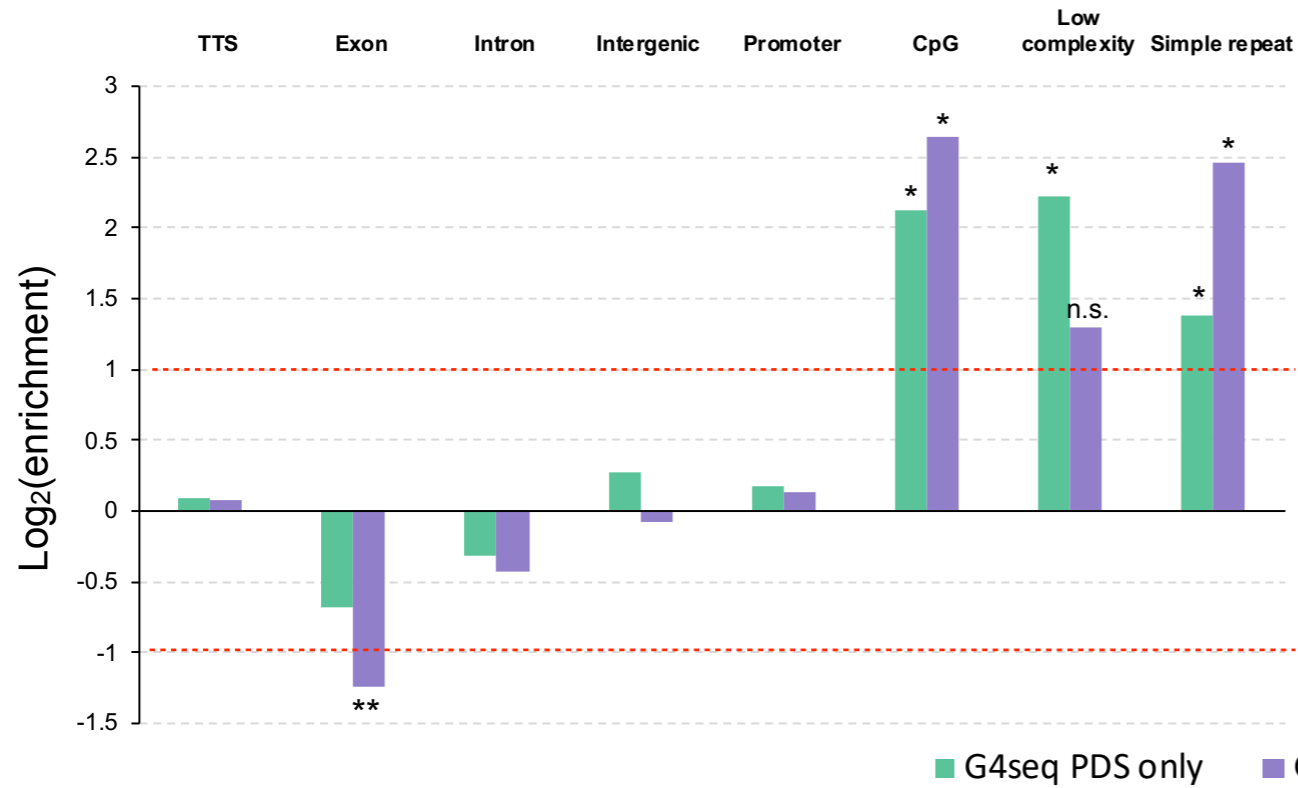

### *Leishmania* (*L.major*)

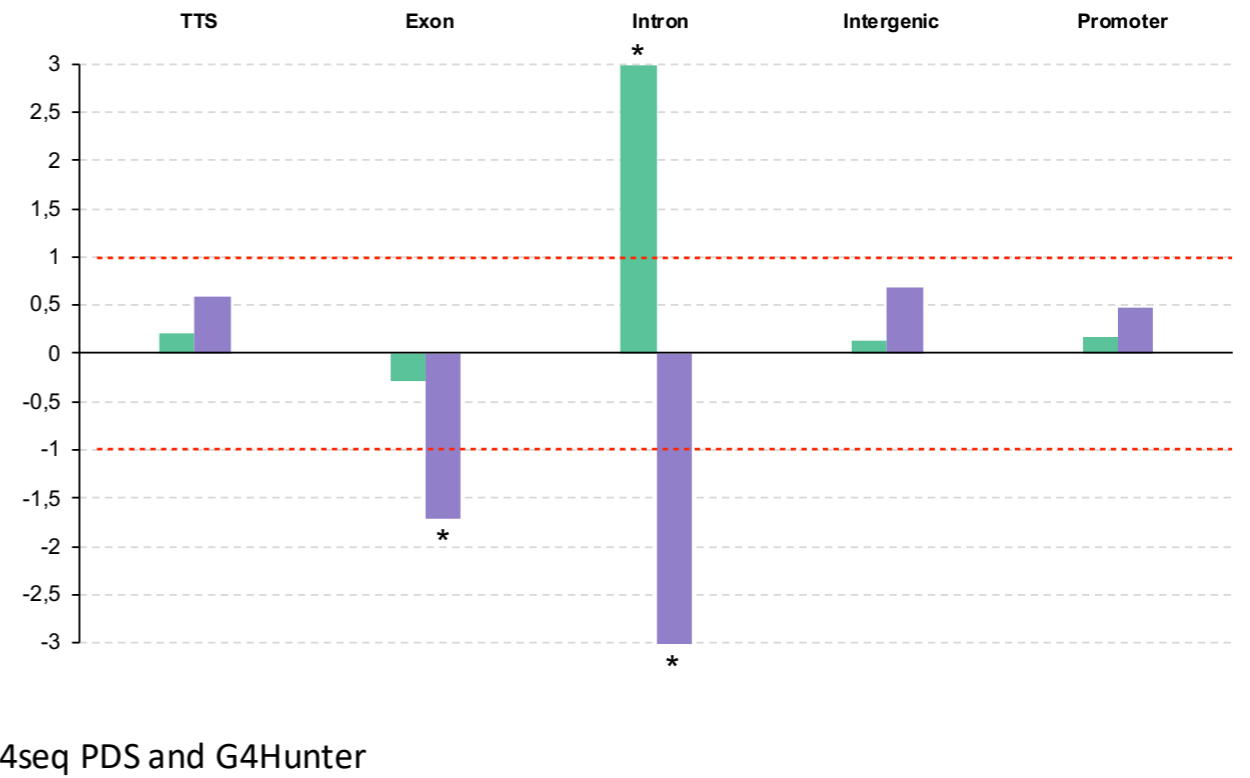

**Figure S2. Annotation of G-quadruplex sequences found exclusively by G4-seq.** The annotations of G4 sequences found exclusively (i.e. no overlaps between the sets) *in vitro* using the G4-seq method (green) were compared to those of the motifs predicted by both the G4Hunter algorithm and G4-seq (purple). Genomic features were obtained from the respective annotation files in the two species shown and are reported on the x-axes. Log<sub>2</sub>(enrichment) for each of the assessed features is reported on the y-axes. Permutation tests (n=100 permutations) were performed to assess the significance of the associations; \*\*,  $p$ -value < 0.01 and |local z-score| > 10; \*,  $p$ -value < 0.05 and |local z-score| > 10.
